# Supplementary material for: Chimeric antigen receptor–engineered T cells as oncolytic virus carriers
Source: PubMed Central journal article supplement — Mol Ther Oncolytics. 2015 Sep 9;2:15014–. doi: 10.1038/mto.2015.14 (PMC4782951; doi:10.1038/mto.2015.14), 2015-09-09
Supplement: mto201514-s1.pdf [file mto201514-s1.pdf]

**Supplemental Material**

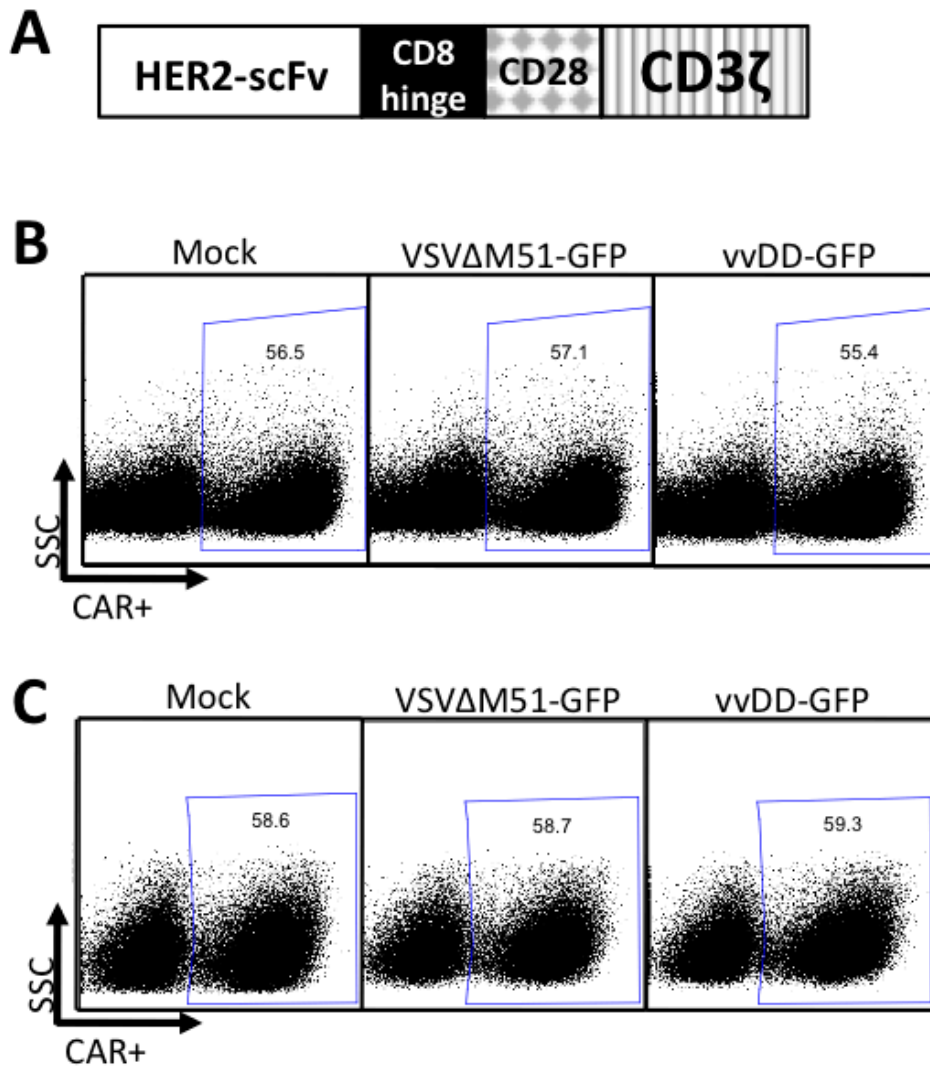

**Supplemental Figure 1: Engineering T cells with CARs.** (a) Schematic of the CAR construct used in both murine and human T cell engineering. (b-c) Human T cells were engineered with the HER-2-CAR with or without subsequent OV-loading, and stained for CAR expression using a HER2-Fc fusion protein, and detected using an anti-human IgG secondary antibody. Human (b) CD8<sup>+</sup> T cells and (c) CD4<sup>+</sup> T cells showing representative flow cytometry plots of CAR<sup>+</sup> staining.

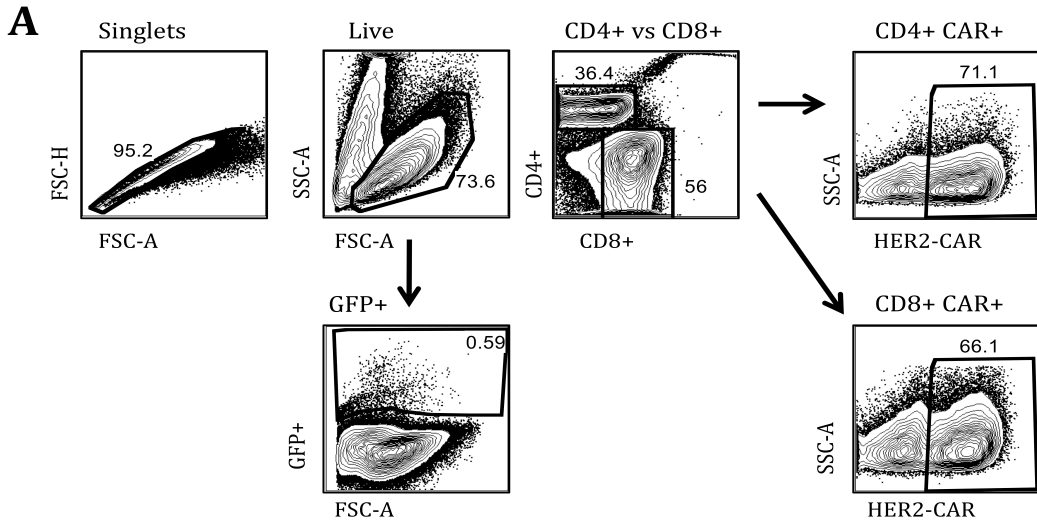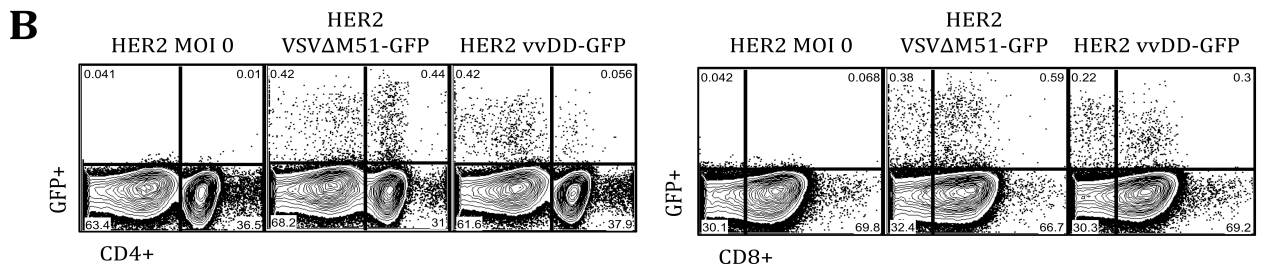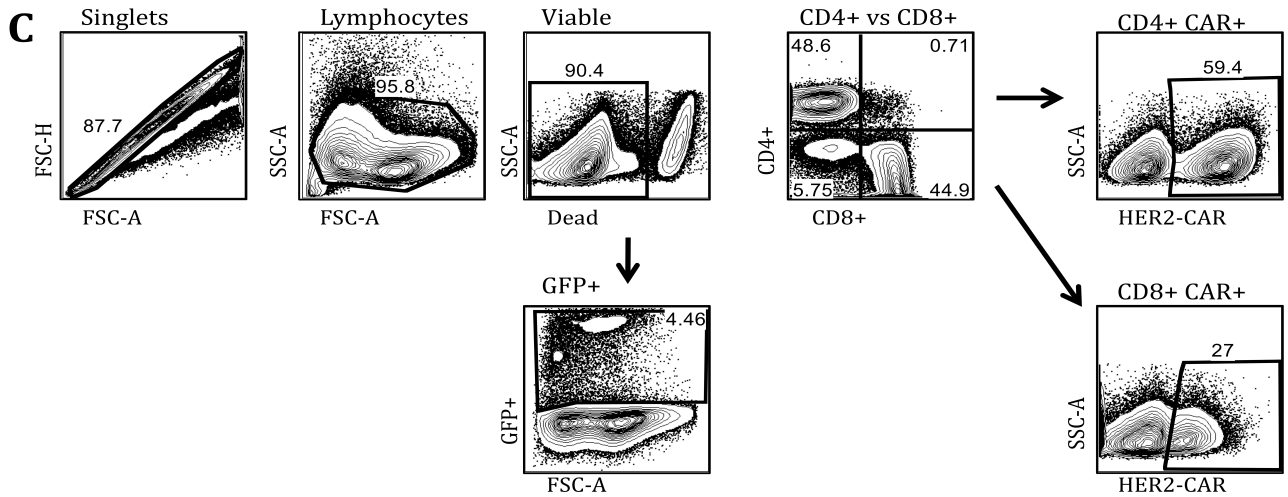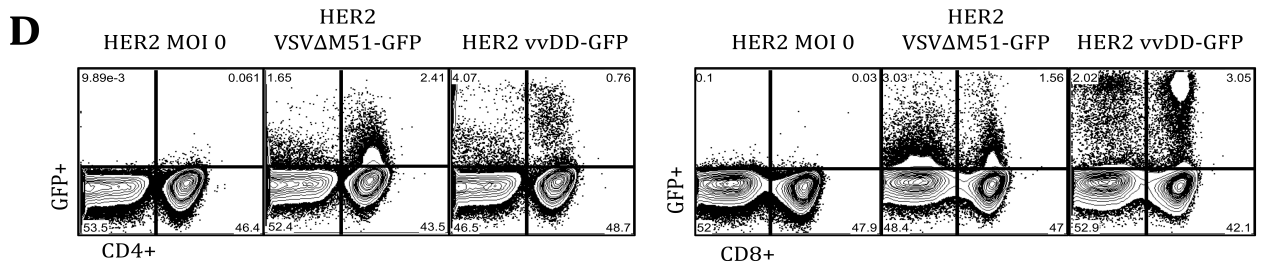

**Supplemental Figure 2: Flow cytometry gating strategies and GFP expression on T cell subsets. (a)**

Murine or (c) human engineered T cell cultures loaded with vvDD-GFP indicating the gating strategy used to define OV-infected T cells, as well as levels of CAR expression on CD4+ and CD8+ T cells. Data is presented from day 1 post OV-load, and is representative of several independent experiments and T cell donors. Murine (b) and human (d) T cells examined for GFP+ staining following loading with either mock, VSVΔM51-GFP or vvDD-GFP showing the presence of GFP+ cells within the CD4+ and CD8+ T cell populations.

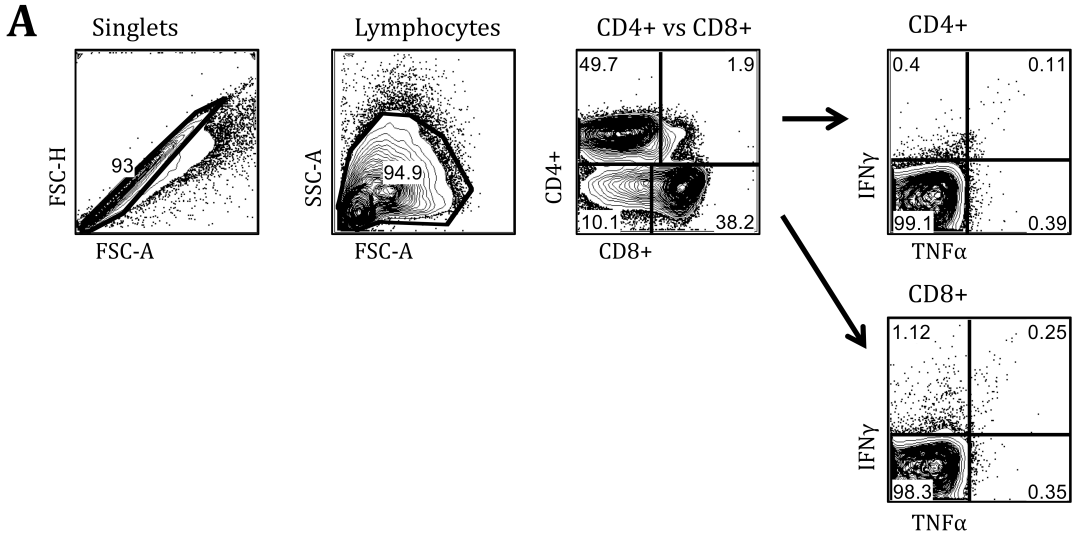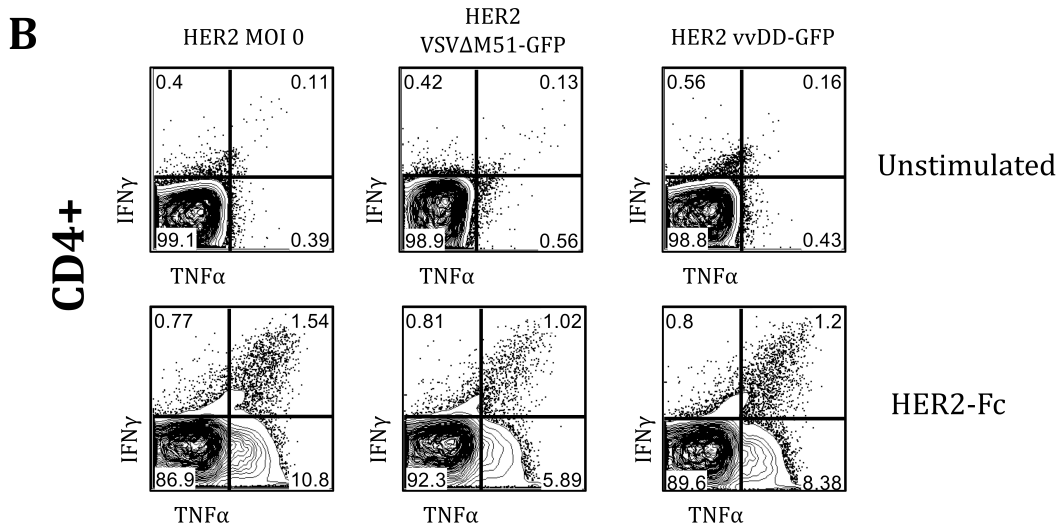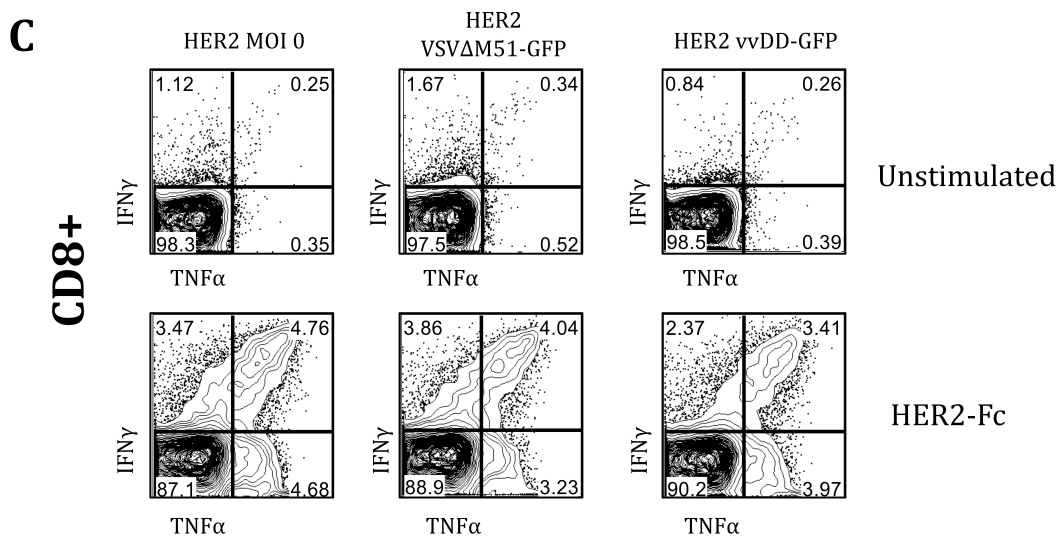

**Supplemental Figure 3: OV-loaded CAR- T cell cytokine staining.** (a) Flow cytometry gating strategies for T cell cytokine production assays. Depicted data shows unstimulated, mock-loaded human HER2-CAR T cells as reference for where gates were set. (b-c) Human HER2-CAR T cells loaded with the indicated viruses (at day 1 post OV-load) were either unstimulated (PBS) or stimulated with plate-bound HER2-Fc antigen for 4 hours at 37°C in the presence of brefeldin A. Cytokine production was measured using flow cytometry. Data is gated on either (b) CD4+ or (c) CD8+ cells as in panel (a). Data is representative of several independent experiments and T cell donors.

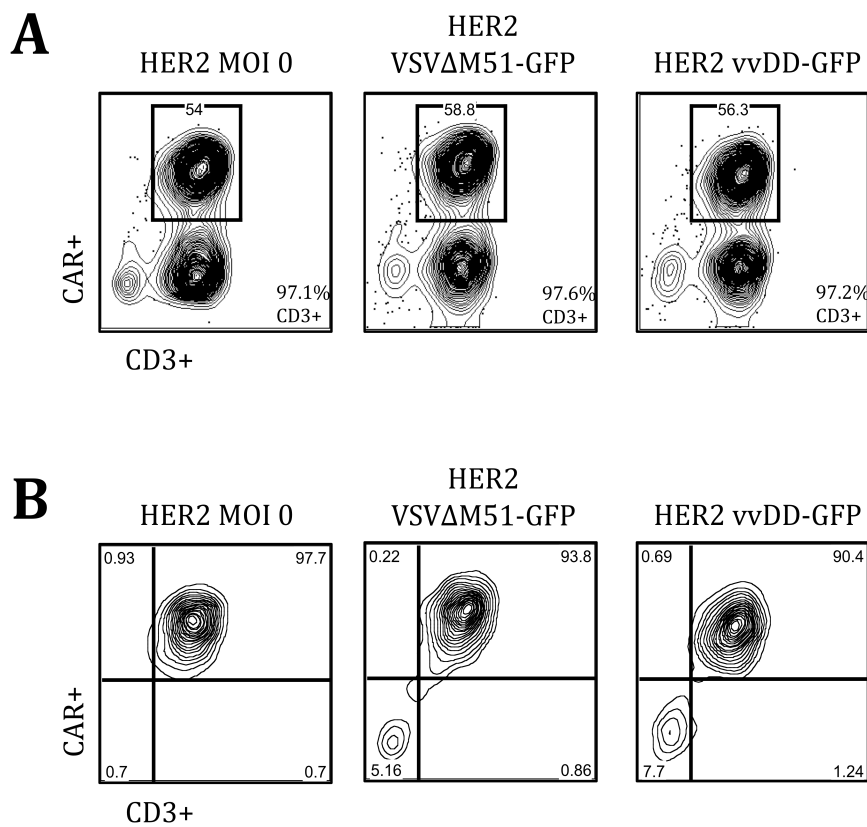

**Supplemental Figure 4: Flow cytometry sorting of CD3+ CAR+ following virus loading.** (a) Pre-sorting gating of HER2-CAR engineered human T cells, showing CD3+ and CAR+ staining used for purifying cells for use in viral titration assays. (b) Purity of CD3+ CAR+ T cells following flow cytometry sorting. These cells were collected, frozen and used to titrate the virus on the surface of the purified T cells as found in Table S3.

**Table S1:** Frequency of CAR+ and CAR- subpopulations infected with OV (as indicated by GFP+). Data presented as mean frequency of CAR+ CD8+ T cells  $\pm$  SEM.

| Days post load | VSV $\Delta$ M51-GFP |                 | vvDD-GFP        |                 |
|----------------|----------------------|-----------------|-----------------|-----------------|
|                | %GFP+ of CAR+        | %GFP+ of CAR-   | %GFP+ of CAR+   | %GFP+ of CAR-   |
| 1              | 4.52 $\pm$ 0.18      | 3.14 $\pm$ 0.22 | 2.9 $\pm$ 0.18  | 1.19 $\pm$ 0.05 |
| 2              | 4.12 $\pm$ 0.16      | 2.75 $\pm$ 0.31 | 3.94 $\pm$ 0.35 | 1.45 $\pm$ 0.02 |
| 3              | 1.81 $\pm$ 0.07      | 1.24 $\pm$ 0.11 | 6.82 $\pm$ 1.96 | 2.84 $\pm$ 0.64 |
| 5              | 1.33 $\pm$ 0.06      | 0.64 $\pm$ 0.09 | 5.94 $\pm$ 0.95 | 2.89 $\pm$ 0.32 |
| 7              | 1.07 $\pm$ 0.07      | 0.63 $\pm$ 0.05 | 5.43 $\pm$ 0.89 | 2.76 $\pm$ 0.31 |

**Table S2:** Cytokine production from GFP+ and GFP- subsets of vvDD-GFP-loaded HER2-CAR T cells following HER2 stimulation. Data is normalized to unstimulated cells, and presented as mean frequency  $\pm$  SEM.

|      | Cytokine(s)    |      | Days Post Load  |                  |                  |                 |                 |
|------|----------------|------|-----------------|------------------|------------------|-----------------|-----------------|
|      |                |      | 1               | 2                | 3                | 5               | 7               |
| CD4+ | IFN $\gamma$ + | GFP+ | 0.80 $\pm$ 0.11 | 0.30 $\pm$ 0.25  | 0.77 $\pm$ 0.89  | 0.51 $\pm$ 0.02 | 0.48 $\pm$ 0.03 |
|      |                | GFP- | 1.97 $\pm$ 0.64 | 2.31 $\pm$ 0.79  | 1.96 $\pm$ 0.80  | 0.60 $\pm$ 0.84 | 1.78 $\pm$ 1.36 |
|      | TNF $\alpha$ + | GFP+ | 2.76 $\pm$ 0.89 | 5.78 $\pm$ 0.90  | 7.67 $\pm$ 2.74  | 3.87 $\pm$ 0.26 | 3.94 $\pm$ 0.09 |
|      |                | GFP- | 8.45 $\pm$ 0.15 | 12.38 $\pm$ 0.13 | 12.11 $\pm$ 1.34 | 7.91 $\pm$ 0.11 | 7.61 $\pm$ 0.73 |
| CD8+ | IFN $\gamma$ + | GFP+ | 2.24 $\pm$ 0.06 | 0.37 $\pm$ 0.01  | 0.32 $\pm$ 0.11  | 0.47 $\pm$ 0.03 | 0.38 $\pm$ 0.05 |
|      |                | GFP- | 5.15 $\pm$ 0.50 | 3.57 $\pm$ 0.59  | 2.57 $\pm$ 0.58  | 1.38 $\pm$ 0.48 | 2.85 $\pm$ 1.83 |
|      | TNF $\alpha$ + | GFP+ | 4.97 $\pm$ 0.05 | 2.70 $\pm$ 0.28  | 2.28 $\pm$ 0.61  | 1.17 $\pm$ 0.24 | 2.18 $\pm$ 0.47 |
|      |                | GFP- | 6.44 $\pm$ 0.20 | 5.41 $\pm$ 0.18  | 4.41 $\pm$ 0.26  | 3.16 $\pm$ 0.26 | 3.86 $\pm$ 1.22 |

**Table S3:** Viral titers from purified CD3+ CAR+ T cells loaded with VSV $\Delta$ M51-GFP or vvDD-GFP. T cells were purified using flow cytometric sorting on CD3+ CAR+ cells (as depicted in Figure S4). Purified cells were frozen and used in viral plaque assays to assess viral titer on purified, CAR+ T cells.

**Virus Titer (PFU)**

|                                  | VSV $\Delta$ M51-GFP                        | vvDD-GFP                                                           |
|----------------------------------|---------------------------------------------|--------------------------------------------------------------------|
| Purified HER2-CAR+, CD3+ T cells | 6.14 $\times$ 10 <sup>2</sup> ( $\pm$ 1.41) | 2.09 $\times$ 10 <sup>4</sup> ( $\pm$ 6 $\times$ 10 <sup>2</sup> ) |
